# Supplementary material for: CRISPR-Cas9 Causes Chromosomal Instability and Rearrangements in Cancer Cell Lines, Detectable by Cytogenetic Methods
Source: PubMed Central journal article supplement (PMC6919265; doi:10.1089/crispr.2019.0006), 2019-12-16
Supplement: Supp_Fig1.pdf [file Supp_Fig1.pdf]

## Supplementary Data

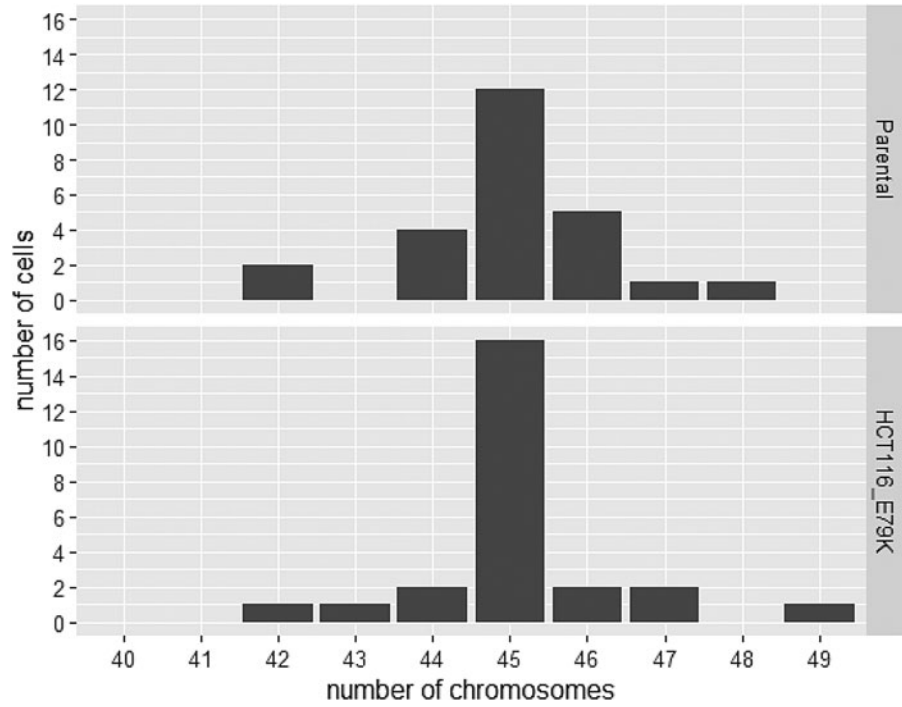

**SUPPLEMENTARY FIG. S1.** Hct116 CRIPSR clone has a normal chromosome count. Graphs showing the chromosome counts per cell of the parental and E79K mutant line. Both lines have a modal number of 45 chromosomes and a similar distribution.
