# Supplementary material for: CRISPR-Cas9 Causes Chromosomal Instability and Rearrangements in Cancer Cell Lines, Detectable by Cytogenetic Methods
Source: PubMed Central journal article supplement (PMC6919265; doi:10.1089/crispr.2019.0006), 2019-12-16
Supplement: Supp_Table_1_2.pdf [file Supp_Table_1_2.pdf]

**Supplementary Table S1. Details of Experimental Aims, Loci, Cells, Target Sequences, and Screening Primers**

| <i>Experiment</i> | <i>Gene</i> | <i>Cell Line</i>                             | <i>Target sequence</i>                                             | <i>Desired mutation</i>                                             | <i>Genomic location</i>                                                             | <i>Screening primers</i>                                                                                                                                      | <i>Size (bp)</i>  |
|-------------------|-------------|----------------------------------------------|--------------------------------------------------------------------|---------------------------------------------------------------------|-------------------------------------------------------------------------------------|---------------------------------------------------------------------------------------------------------------------------------------------------------------|-------------------|
| 1                 | MLH1        | COLO320, colon, adenocarcinoma, hyperdiploid | ATGGCGTAAGCTACAGCTGA (G to A)<br>ATGGCGTAAGCTACAGCTAA (A to G)     | Mutation of heterozygous SNP: rs1800734 A/G to homozygous AA and GG | Chr3: 36993437–36993456                                                             | F-AGCAACCCACAGAGTTGAGA<br>R-GAATAACCCCTGCCACGAAC                                                                                                              | 213               |
| 2                 | POLE        | HCC2998, colon, adenocarcinoma, diploid      | TCAAGTTTCgTGATGCTGAG<br>ATGATTTCCTACATGATCGA                       | Revertant of a pathogenic point mutation                            | Chr12: 133253174–133253193<br>Chr12: 133253139–133253158                            | F-CTAACAGTGGGGCAGATGCT<br>R-GGTGTTTCAGGGAGGCCTAAT                                                                                                             | 258               |
| 3                 | NFE2L2      | SW1463, rectum, adenocarcinoma, hyperdiploid | ACTGGGCTCGATGTGACC<br>GTGTTCTGGTGATGCCACAC<br>TATTTGACTTCAGTCAGCGA | Indel causing gene knockout                                         | Chr2: 177232522–177232544<br>Chr2: 177231526–177231548<br>Chr2: 177234188–177234210 | F-AGGCCAAGTAGTGTGTCTCC;<br>R-ATGCCCTCACCTGCTACCTTT<br>F-AGGCCAAGTAGTGTGRTCC;<br>R-ATGCCCTCACCTGCTACTTT<br>F-TGATTGACATACTTTGGAGGCA;<br>R-GCTGGCTGAATTGGGAGAAA | 224<br>224<br>211 |

**Supplementary Table S2. HDR Template Sequences**

| <i>Experiment</i> | <i>Gene</i> | <i>HDR template</i>                                                                                                                               |
|-------------------|-------------|---------------------------------------------------------------------------------------------------------------------------------------------------|
| 1                 | MLH1 A to G | GACTGGCATTCAAGCTGTCCAATCAATAGCTGCCGCTGAAGGGTGGGGCTGGATGGCGTAAGCTACAGCTgAAGGAAGAACGTGAGCACGAGGCACTGA<br>GGTGATTGGCTGAAGGCACTTCCGTTGAGCATCTAGACGTTT |
| 1                 | MLH1 G to A | GACTGGCATTCAAGCTGTCCAATCAATAGCTGCCGCTGAAGGGTGGGGCTGGATGGCGTAAGCTACAGCTaAAGGAAGAACGTGAGCACGAGGCACTG<br>AGGTGATTGGCTGAAGGCACTTCCGTTGAGCATCTAGACGTTT |
| 2                 | POLE        | ATTTTGTCCCCACAGGACCCTGTGGTTTTGGCATTGACATTGAGACGACCAAACCTGCCCTCAAGTTTCcTGATGCTGAGACAGACCAGATTATGATGATT<br>TCCTACATGATCGATGGCCAGGTGAGCAGGTGGCTTCTG  |
