# Supplementary material for: CRISPR-Cas9 Causes Chromosomal Instability and Rearrangements in Cancer Cell Lines, Detectable by Cytogenetic Methods
Source: PubMed Central journal article supplement (PMC6919265; doi:10.1089/crispr.2019.0006), 2019-12-16
Supplement: Supp_Table_3-5.pdf [file Supp_Table_3-5.pdf]

**Supplementary Table S3. Details of Probes Used in FISH Experiments**

| <i>BAC/PAC/plasmid</i>  | <i>Start (hg19)</i> | <i>End (hg19)</i> | <i>Cytogenetic band</i> | <i>Symbol</i>        |
|-------------------------|---------------------|-------------------|-------------------------|----------------------|
| RP11-56P22              | 35,006,192          | 35,156,133        | 3p22.3                  | MLH flanking left    |
| RP11-491D6              | 37,059,146          | 37,161,516        | 3p22.2                  | MLH                  |
| RP11-331G2              | 39,160,068          | 39,336,652        | 3p22.2                  | MLH flanking right   |
| pAE068                  | na                  | na                | Chromosome 3 centromere | Cen3                 |
| px330                   | na                  | na                | na                      | CRISPR Plasmid       |
| RP11-25J3               | 75,892,543          | 76,047,496        | 12q21.2                 | Chr12 Internal probe |
| RP11-148L11             | 133,038,915         | 133,243,361       | 12q24.33                | PoIE                 |
| CTC221K18 <sup>S1</sup> | na                  | na                | 12q24.3                 | Telo 12q             |

**Supplementary Table S4. Mutation of SNP rs1800734 in the MLH1 Promoter in COLO320 Cells Using RNP Delivery: Summary of FISH Signals at the Target Loci**

| <i>Clone and mutation</i> | <i>Metaphases analyzed</i> | <i>Number of MLH1 FISH signals (% of cells)</i> |                  |                 |                    |                           |
|---------------------------|----------------------------|-------------------------------------------------|------------------|-----------------|--------------------|---------------------------|
|                           |                            | <i>1 copy</i>                                   | <i>2 copies</i>  | <i>3 copies</i> | <i>4 copies</i>    | <i>More than 4 copies</i> |
| AA targeted indel 1       | 28                         | 10.70%                                          | 75%              | —               | 14.3% (tetraploid) | —                         |
| AA targeted indel 2       | 26                         | —                                               | 88%              | 4%              | 8% tetraploid      | —                         |
| AA targeted indel 3       | 25                         | 8%                                              | 80%              | 8%              | 4%                 | —                         |
| AA targeted AA            | 25                         | 4%                                              | 16%              | 20%             | 20%                | 40%                       |
| GG targeted indel 1       | 28                         | —                                               | 96.40%           | —               | 8% (tetraploid)    | —                         |
| GG targeted indel 2       | 26                         | —                                               | 92%              | —               | 8% (tetraploid)    | —                         |
| GG targeted GG            | 25                         | 88%                                             | 12% (tetraploid) | —               | —                  | —                         |
| Non-target wild type 1    | 28                         | —                                               | 96%              | —               | 4% (tetraploid)    | —                         |
| Non-target wild type 2    | 25                         | 16%                                             | 72%              | 4%              | 8% (tetraploid)    | —                         |
| Non-target wild type 3    | 26                         | 24%                                             | 56%              | 12%             | 12% (tetraploid)   | —                         |
| Puro treated Clone1       | 40                         | 7.50%                                           | 90%              | 2.50%           | —                  | —                         |
| Puro treated Clone2       | 25                         | —                                               | 100%             | —               | —                  | —                         |

The two clones with the desired mutation according to Sanger sequencing are highlighted in gray. The percentage of clones with two normal FISH signals is conditionally highlighted in shades of green.

**Supplementary Table S5. Genes Deleted in Chromosomes Truncated Due to Unrepaired DSBs After CRISPR-Cas9 Mutation at *POLE***

***Genes distal to *POLE* on chr12q***

*PXMP2*  
*PGAM5*  
*ANKLE2*  
*COLGA3*  
*CHFR*  
*ZNF605*  
*ZNF26*  
*ZNF84*  
*ZNF140*  
*ZNF891*  
*ZNF269*  
*ZNF10*

**Supplementary Reference**

S1. Knight SJ, Lese CM, Precht KS, et al. An optimized set of human telomere clones for studying telomere integrity and architecture. *Am J Hum Genet* 2000;67:320–332. DOI: 10.1086/302998.
